# Supplementary material for: Α Humanized RANKL Transgenic Mouse Model of Progestin-Induced Mammary Carcinogenesis for Evaluation of Novel Therapeutics
Source: MDPI journal article supplement (doi:10.3390/cancers15154006), 2023-08-07
Supplement: s1 [file s1]

# Supplementary materials

## **A humanized RANKL transgenic mouse model of progestin-induced mammary carcinogenesis for evaluation of novel therapeutics**

Anthi Kolokotroni<sup>1,2</sup>, Evi Gkikopoulou<sup>1,2</sup>, Vagelis Rinotas<sup>2</sup>, Lydia Ntari<sup>3</sup>, Danae Zareifi<sup>4</sup>, Maritina Rouchota<sup>5</sup>, Sophia Sarpaki<sup>5</sup>, Ilias Lymperopoulos<sup>6</sup>, Leonidas G Alexopoulos<sup>4</sup>, George Loudos<sup>5</sup>, Maria C Denis<sup>3</sup>, Niki Karagianni<sup>3</sup>, Eleni Douni<sup>1,2,\*</sup>

<sup>1</sup>Laboratory of Genetics, Department of Biotechnology, Agricultural University of Athens, Iera Odos 75, 11855 Athens, Greece

<sup>2</sup>Institute for Bioinnovation, Biomedical Sciences Research Center "Alexander Fleming", Fleming 34, 16672 Vari, Greece

<sup>3</sup>Biomedcode Hellas SA, Fleming 34, 16672 Vari, Greece

<sup>4</sup>Department of Mechanical Engineering, National Technical University of Athens, 10682 Athens, Greece

<sup>5</sup>BIOEMTECH, Lefkippos Attica Technology Park, NCSR "Demokritos", 15343 Ag. Paraskevi-Athens, Greece

<sup>6</sup>1<sup>st</sup> Breast Clinic, Iaso Hospital, 37-39 Kifissias, 15123 Marousi, Greece

\* Correspondence: douni@aia.gr or douni@fleming.gr

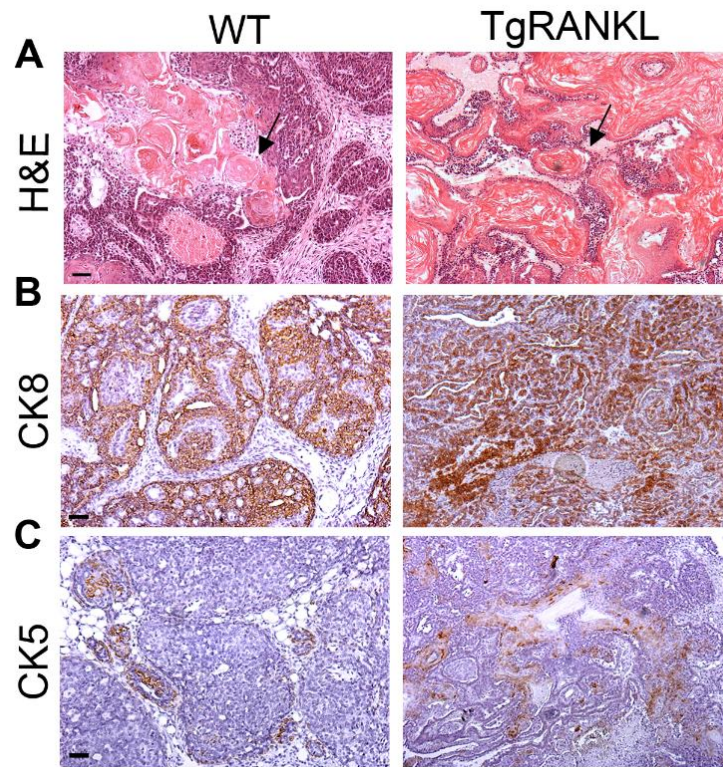

**Figure S1. Histological analysis of MPA/DMBA-induced mammary tumors in WT and TgRANKL mice.** Representative histological sections of mammary tumors isolated from WT and TgRANKL mice stained with **(A)** hematoxylin and eosin, **(B)** Cytokeratin 8, and **(C)** Cytokeratin 5 (n=3/group). Keratin pearls are indicated by arrows. Scale bar, 80µm.

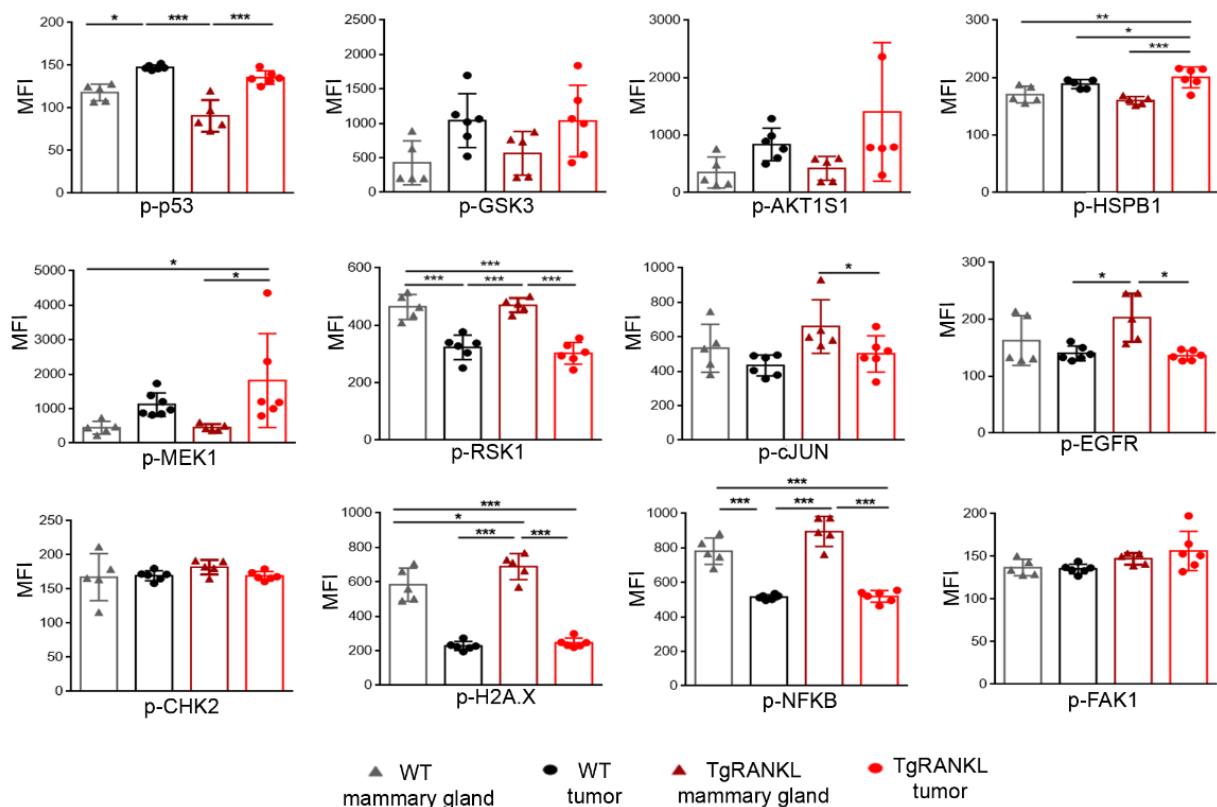

**Figure S2. Additional multiplex ELISA analysis for phospho-proteins.** p-p53, p-GSK3, p-AKT1S1, p-HSPB1, p-MEK1, p-RSK1, p-cJUN, p-EGFR, p-CHK2, p-H2A.X, p-NFkB and p-FAK1 were measured in mammary glands and tumors from WT and TgRANKL mice (n=5=6/group). Comparison was performed with one-way ANOVA and Tukey's post hoc test (\* p<0.05, \*\* p<0.01, \*\*\* p<0.001).

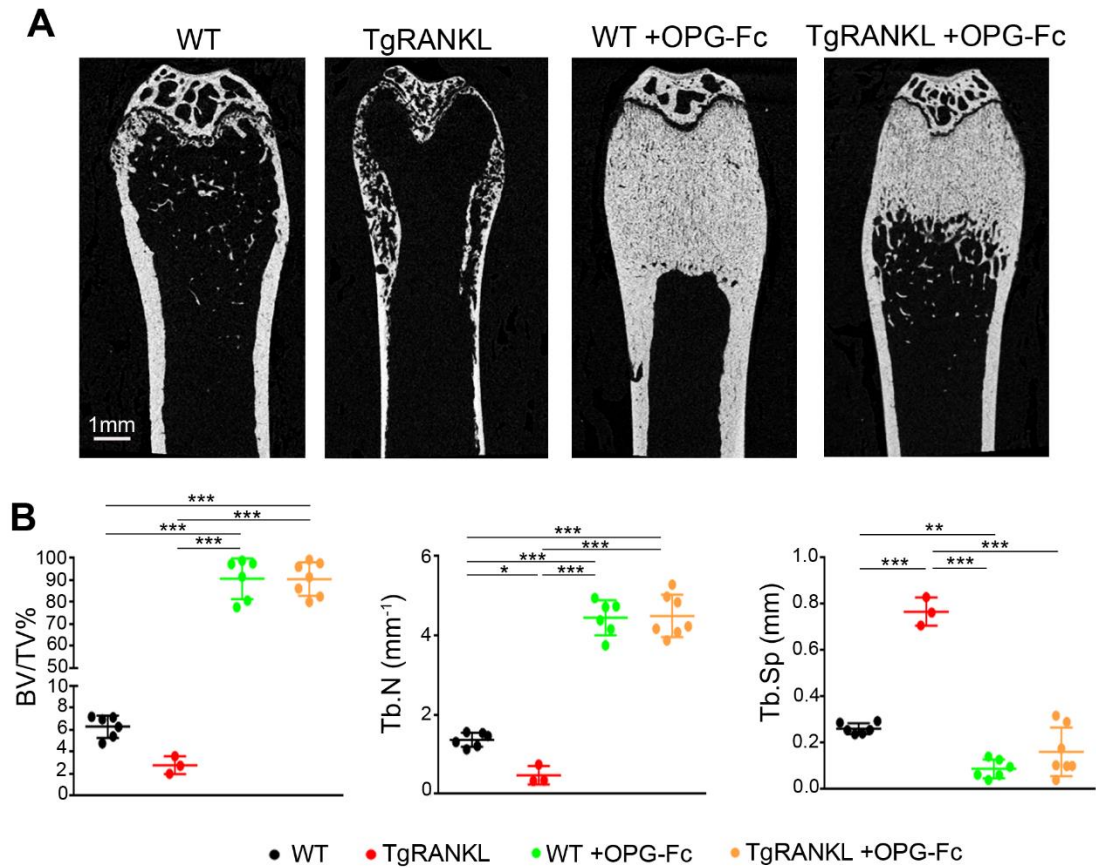

**Figure S3. OPG-Fc treatment prevented bone resorption in WT and TgRANKL mice. (A)** Representative microCT 2D images and **(B)** quantitative analysis for BV/TV%, Tb.N, and Tb.Sp in the trabecular bone of femurs from MPA/DMBA-treated WT and TgRANKL mice with or without OPG-Fc treatment (n = 3-7/group). Data are shown as mean  $\pm$  SD. One-Way ANOVA was performed for statistical analysis (\*p < 0.05, \*\*p < 0.01, \*\*\*p < 0.001).

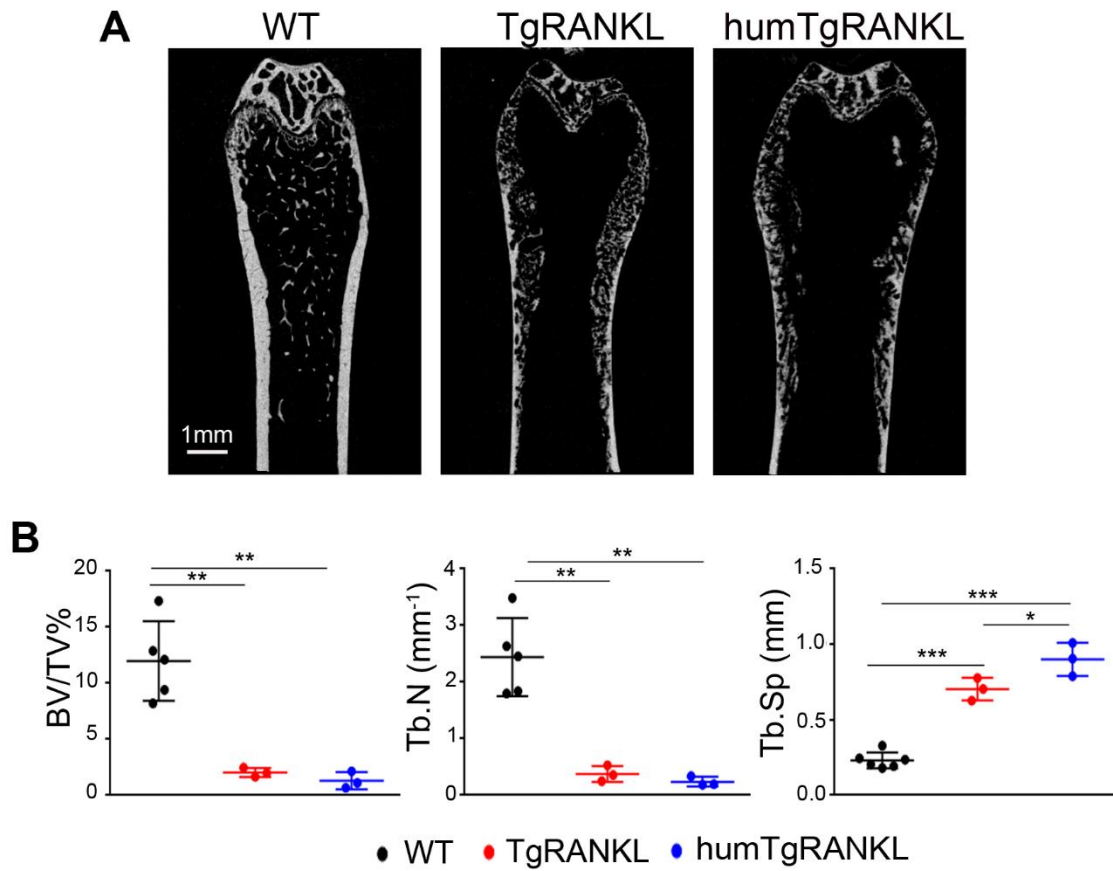

**Figure S4. Humanized TgRANKL mice developed an osteoporotic phenotype similar to TgRANKL mice.** (A) Representative microCT 2D images and (B) quantitative analysis for BV/TV%, Tb.N, and Tb.Sp in the trabecular bone of femurs from WT, TgRANKL and humTgRANKL mice (n = 3-5/ group). Data are shown as mean ± SD. One-Way ANOVA was performed for statistical analysis (\*p < 0.05, \*\*p < 0.01, \*\*\*p < 0.001).

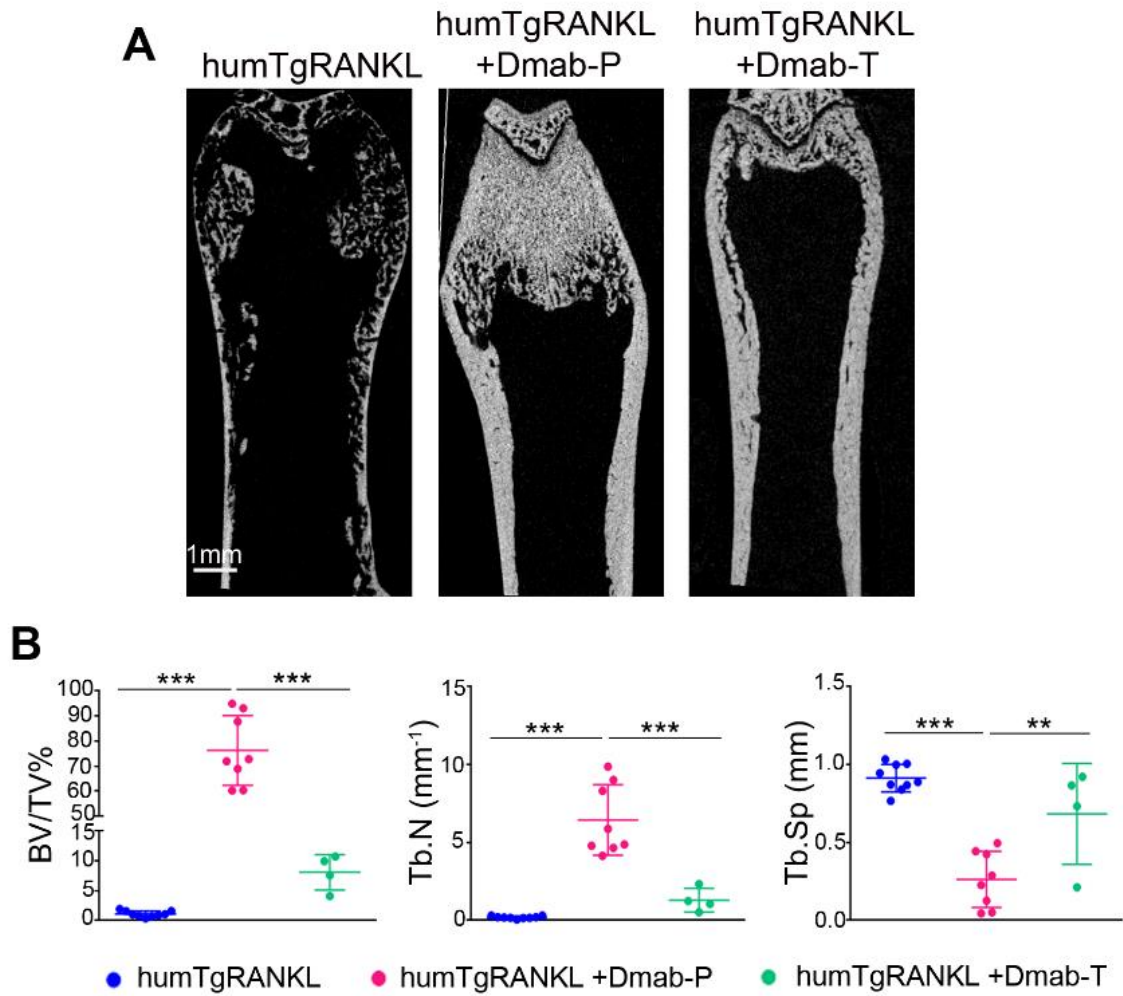

**Figure S5. Effect of either prophylactic or therapeutic treatment of humTgRANKL mice with denosumab in bone architecture.** (A) Representative microCT 2D images and (B) quantitative analysis for BV/TV%, Tb.N, and Tb.Sp in the trabecular bone of femurs from MPA/DMBA-treated humTgRANKL mice without or with Dmab treatment either prophylactically (Dmab-P) or therapeutically (Dmab-T) (n = 4-9 group). Data are shown as mean  $\pm$  SD. One-Way ANOVA was performed for statistical analysis (\*\* $p$  < 0.01, \*\*\* $p$  < 0.001).

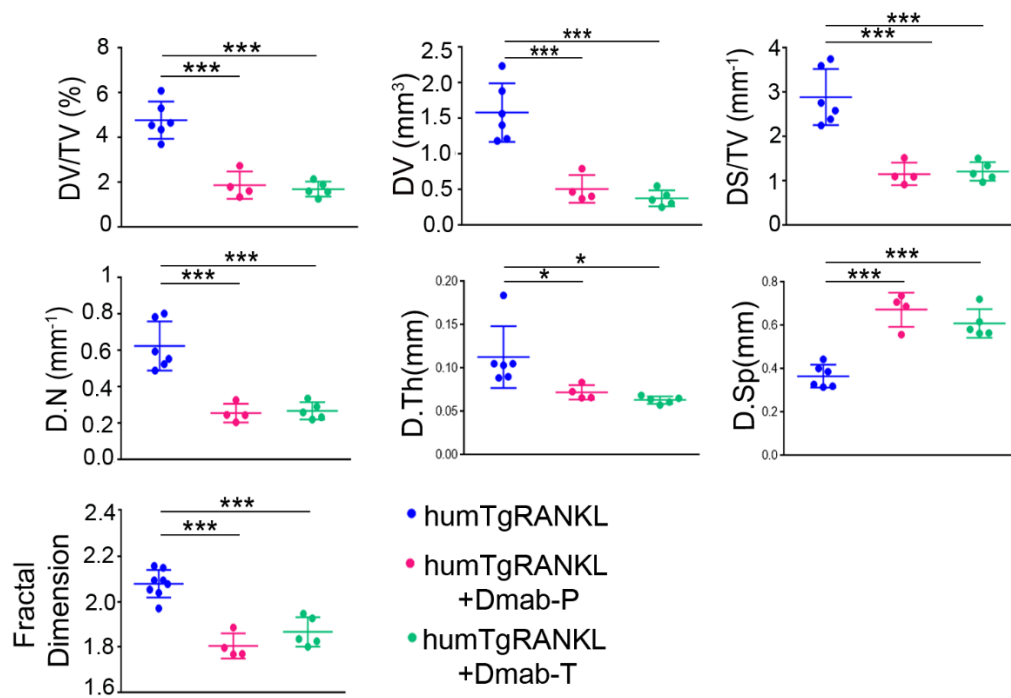

**Figure S6. Denosumab restores MPA/DMBA-induced mammary gland density in humTgRANKL mice.** Quantitative microCT analysis of mammary gland epithelium from humTgRANKL mice either untreated or treated with Dmab prophylactically or therapeutically (n=4-6 mice/group) DV/TV%: Ductal volume/Tissue volume %, DV (mm<sup>3</sup>): Ductal volume, DS/TV (mm<sup>-1</sup>): Ductal Surface/Tissue Volume, Volume, D.N (mm): Ductal number, D.Th (mm): Ductal Thickness, D.Sp (mm): Ductal Separation, Fractal Dimension. Data are shown as mean  $\pm$  SD. One-Way ANOVA was performed for statistical analysis (\* p<0.05, \*\*\* p<0.001).

**Table S1.** Primer sequences used in qPCR.

| Target genes      | Forward (5'-3')          | Reverse (5'-3')          |
|-------------------|--------------------------|--------------------------|
| <i>B2M</i>        | ACATCAAGAAGGTGGTGAAGCAGG | AGTTGCTGTTGAAGTCGCAGGAGA |
| <i>mu+huRankl</i> | ACCTGTACGCCAACATTTGC     | CTTGGG ATTTTGATGCTGGT    |
| <i>huRankl</i>    | ACGCGTATTTACAGCCAGTG     | 5CCCGTAATTGCTCCAATCTG    |
| <i>muRankl</i>    | TGTACTTTTCGAGCGCAGATG    | AGGCTTGTTTCATCCTCCTG     |
| <i>muOpg</i>      | TGATGTATGCCCTCAAGCAC     | TTGTGAAGCTGTGCAGGAAC     |
| <i>muRank</i>     | TCTTATGTTGGGGTCCATCC     | AATAAGCTTAGCCCCGAACC     |
| <i>muPr</i>       | CTCCGGGACCGAACAGAGT      | ACAACAACCCTTTGGTAGCAG    |
| <i>muEra</i>      | AATGAAATGGGTGCTTCAGG     | ATAGATCATGGGCGGTTTCAG    |
| <i>muCcmd1</i>    | GCGTACCCTGACACCAATCTC    | CTCCTCTTCGCACTTCTGCTC    |
| <i>muLgr5</i>     | CCTACTCGAAGACTTACCCAGT   | GCATTGGGGTGAATGATAGCA    |
| <i>muLgr4</i>     | TACAACCTGGCTGGTAACGACC   | TTGAGTTCTTTCAACCCAGACAA  |
| <i>muSox2</i>     | AAAGGGTTCTTGCTGGGTTT     | AGACCACGAAAACGGTCTTG     |
| <i>muSox9</i>     | CGGAACAGACTCACATCTCTCC   | CTTGACACGTCGGTTTTTG      |
| <i>muSlug</i>     | TCAACGCCTCCAAGAAGCCCA    | ATAGGGCTGTATGCTCCCGAGGT  |



**Table S2.** Protein assays of the custom-developed 19-plex assay panel and their phosphorylation residues.

|    | <b>Protein-assay abbreviation</b> | <b>Protein name</b>                                            | <b>Phosphorylation Residue</b> |
|----|-----------------------------------|----------------------------------------------------------------|--------------------------------|
| 1  | Smad3                             | Mothers against decapentaplegic homolog 3                      | S423/S425                      |
| 2  | p53                               | Cellular tumour antigen p53                                    | S15                            |
| 3  | AKTS1                             | Proline-rich AKT1 substrate 1                                  | T246                           |
| 4  | GSK3                              | Glycogen synthase kinase-3 alpha/beta                          | S21/9                          |
| 5  | AKT1                              | RAC-alpha serine/threonine-protein kinase                      | S473                           |
| 6  | HSP27 (HSPB1)                     | Heat shock protein beta-1                                      | S78/S82                        |
| 7  | p38                               | Mitogen-activated protein kinase 14/11                         | T180/Y182                      |
| 8  | MEK1                              | Dual specificity mitogen-activated protein kinase kinase 1     | S217/S221                      |
| 9  | RSK1                              | Ribosomal protein S6 kinase alpha-1                            | S380                           |
| 10 | CREB1                             | Cyclic AMP-responsive element-binding protein 1                | S133                           |
| 11 | cJUN                              | Transcription factor Jun                                       | S63                            |
| 12 | EGFR                              | Epidermal growth factor receptor                               | Y1068                          |
| 13 | PTN11                             | Tyrosine-protein phosphatase non-receptor type 11              | Y542                           |
| 14 | CHK2                              | Serine/threonine-protein kinase Chk2                           | T68                            |
| 15 | H2A.X                             | Histone H2AX                                                   | S139                           |
| 16 | NF-KB                             | Nuclear factor kappa-light-chain-enhancer of activated B cells | S536                           |
| 17 | STAT3                             | Signal transducer and activator of transcription 3             | Y705                           |
| 18 | ERK1                              | Mitogen-activated protein kinase 3                             | T202/Y204                      |
| 19 | FAK1                              | Focal adhesion kinase 1                                        | Y397                           |
